# Supplementary material for: Fasting glucose, bone area and bone mineral density: a Mendelian randomisation study
Source: PubMed Central journal article supplement (PMC8099809; doi:10.1007/s00125-021-05410-w), 2021-03-02
Supplement: 125_2021_5410_MOESM1_ESM.pdf [file 125_2021_5410_MOESM1_ESM.pdf]

**ESM Table 1** Glucose SNP associations from MAGIC and SMCC

| trait   | hg19_coordinate | snp        | Gene                   | effall | otherall | betatrait | setrait | estimate | stderr | P      |
|---------|-----------------|------------|------------------------|--------|----------|-----------|---------|----------|--------|--------|
| glucose | 09:22134094     | rs10811661 | <i>CDKN2B</i>          | T      | C        | 0.024     | 0.003   | -0.0008  | 0.0156 | 0.9589 |
| glucose | 11:92708710     | rs10830963 | <i>MTNR1B</i>          | G      | C        | 0.078     | 0.002   | 0.0720   | 0.0131 | 0.0000 |
| glucose | 10:113042093    | rs10885122 | <i>ADRA2A</i>          | G      | T        | 0.027     | 0.003   | 0.0027   | 0.0176 | 0.8788 |
| glucose | 15:62433962     | rs11071657 | <i>VPS13C/C2CD4A/B</i> | A      | G        | 0.010     | 0.002   | 0.0186   | 0.0120 | 0.1218 |
| glucose | 08:118185733    | rs11558471 | <i>SLC30A8</i>         | A      | G        | 0.029     | 0.002   | 0.0489   | 0.0126 | 0.0001 |
| glucose | 11:72432985     | rs11603334 | <i>ARAP1</i>           | G      | A        | 0.019     | 0.003   | 0.0437   | 0.0151 | 0.0038 |
| glucose | 11:45873091     | rs11605924 | <i>CRY2</i>            | A      | C        | 0.020     | 0.002   | 0.0199   | 0.0117 | 0.0899 |
| glucose | 13:28487599     | rs11619319 | <i>PDX1</i>            | G      | A        | 0.019     | 0.002   | 0.0476   | 0.0144 | 0.0010 |
| glucose | 03:123065778    | rs11708067 | <i>ADCY5</i>           | A      | G        | 0.023     | 0.003   | 0.0108   | 0.0141 | 0.4450 |
| glucose | 03:49455330     | rs11715915 | <i>AMT</i>             | C      | T        | 0.012     | 0.002   | 0.0008   | 0.0124 | 0.9459 |
| glucose | 03:170717521    | rs11920090 | <i>SLC2A2</i>          | T      | A        | 0.026     | 0.003   | 0.0316   | 0.0178 | 0.0765 |
| glucose | 09:111680359    | rs16913693 | <i>IKBKAP</i>          | T      | G        | 0.043     | 0.007   | 0.0914   | 0.0294 | 0.0019 |
| glucose | 11:61571478     | rs174550   | <i>FADS1</i>           | T      | C        | 0.019     | 0.002   | 0.0143   | 0.0122 | 0.2412 |
| glucose | 06:7213200      | rs17762454 | <i>RREB1</i>           | T      | C        | 0.014     | 0.002   | 0.0087   | 0.0139 | 0.5295 |
| glucose | 07:15064309     | rs2191349  | <i>DGKB/TMEM195</i>    | T      | G        | 0.029     | 0.002   | 0.0385   | 0.0118 | 0.0011 |
| glucose |                 | rs2302593  | <i>GIPR</i>            | C      | G        | 0.014     | 0.002   | 0.0295   | 0.0118 | 0.0124 |
| glucose | 12:56865338     | rs2657879  | <i>GLS2</i>            | G      | A        | 0.016     | 0.003   | -0.0142  | 0.0160 | 0.3762 |
| glucose | 01:214159256    | rs340874   | <i>PROX1</i>           | C      | T        | 0.013     | 0.002   | 0.0445   | 0.0118 | 0.0002 |
| glucose | 14:100839261    | rs3783347  | <i>WARS</i>            | G      | T        | 0.017     | 0.003   | 0.0062   | 0.0138 | 0.6546 |
| glucose | 09:139256766    | rs3829109  | <i>LOC728489</i>       | G      | A        | 0.017     | 0.003   | 0.0154   | 0.0128 | 0.2260 |
| glucose | 10:114756041    | rs4506565  | <i>TCF7L2</i>          | T      | A        | 0.021     | 0.002   | 0.0285   | 0.0131 | 0.0301 |
| glucose | 07:44235668     | rs4607517  | <i>GCK</i>             | A      | G        | 0.057     | 0.003   | 0.0674   | 0.0170 | 0.0001 |
| glucose | 05:95539448     | rs4869272  | <i>PCSK1</i>           | T      | C        | 0.018     | 0.002   | 0.0038   | 0.0126 | 0.7652 |
| glucose | 02:169763148    | rs560887   | <i>G6PC2</i>           | C      | T        | 0.071     | 0.002   | 0.0872   | 0.0128 | 0.0000 |
| glucose | 13:33554302     | rs576674   | <i>KL</i>              | G      | A        | 0.017     | 0.003   | -0.0056  | 0.0167 | 0.7393 |

|         |              |           |                |   |   |       |       |        |        |        |
|---------|--------------|-----------|----------------|---|---|-------|-------|--------|--------|--------|
| glucose | 20:39743905  | rs6072275 | <i>TOP1</i>    | A | G | 0.016 | 0.003 | 0.0111 | 0.0151 | 0.4648 |
| glucose | 20:22557099  | rs6113722 | <i>FOXA2</i>   | G | A | 0.035 | 0.005 | 0.0588 | 0.0328 | 0.0726 |
| glucose | 07:50791579  | rs6943153 | <i>GRB10</i>   | T | C | 0.015 | 0.002 | 0.0249 | 0.0128 | 0.0526 |
| glucose | 03:185513392 | rs7651090 | <i>IGF2BP2</i> | G | A | 0.013 | 0.002 | 0.0168 | 0.0131 | 0.2010 |
| glucose | 05:76425867  | rs7708285 | <i>ZBED3</i>   | G | A | 0.015 | 0.003 | 0.0304 | 0.0136 | 0.0255 |
| glucose | 02:27741237  | rs780094  | <i>GCKR</i>    | C | T | 0.027 | 0.002 | 0.0278 | 0.0124 | 0.0253 |
| glucose | 09:4292152   | rs7867224 | <i>GLIS3</i>   | A | G | 0.013 | 0.002 | 0.0081 | 0.0117 | 0.4912 |
| glucose | 11:47336320  | rs7944584 | <i>MADD</i>    | A | T | 0.023 | 0.002 | 0.0405 | 0.0133 | 0.0024 |
| glucose | 06:20686996  | rs9368222 | <i>CDKAL1</i>  | A | C | 0.014 | 0.002 | 0.0208 | 0.0135 | 0.1240 |
| glucose | 08:9177732   | rs983309  | <i>PPP1R3B</i> | T | G | 0.026 | 0.003 | 0.0578 | 0.0185 | 0.0018 |

**ESM Table 2** Glucose SNP associations from MAGIC and PIVUS

| trait   | hg19_coordinate | snp        | Gene                   | effall | otherall | betatrait | setrait | estimate | stderr | p      |
|---------|-----------------|------------|------------------------|--------|----------|-----------|---------|----------|--------|--------|
| glucose | 09:22134094     | rs10811661 | <i>CDKN2B</i>          | T      | C        | 0.024     | 0.003   | 0.0093   | 0.0322 | 0.7726 |
| glucose | 11:92708710     | rs10830963 | <i>MTNR1B</i>          | G      | C        | 0.078     | 0.002   | 0.0597   | 0.0277 | 0.0312 |
| glucose | 10:113042093    | rs10885122 | <i>ADRA2A</i>          | G      | T        | 0.027     | 0.003   | 0.0314   | 0.0374 | 0.4014 |
| glucose | 15:62433962     | rs11071657 | <i>VPS13C/C2CD4A/B</i> | A      | G        | 0.010     | 0.002   | -0.0062  | 0.0249 | 0.8051 |
| glucose | 08:118185733    | rs11558471 | <i>SLC30A8</i>         | A      | G        | 0.029     | 0.002   | 0.0141   | 0.0259 | 0.5852 |
| glucose | 11:72432985     | rs11603334 | <i>ARAP1</i>           | G      | A        | 0.019     | 0.003   | 0.0345   | 0.0332 | 0.2993 |
| glucose | 11:45873091     | rs11605924 | <i>CRY2</i>            | A      | C        | 0.020     | 0.002   | 0.0207   | 0.0249 | 0.4052 |
| glucose | 13:28487599     | rs11619319 | <i>PDX1</i>            | G      | A        | 0.019     | 0.002   | 0.0417   | 0.0295 | 0.1580 |
| glucose | 03:123065778    | rs11708067 | <i>ADCY5</i>           | A      | G        | 0.023     | 0.003   | 0.0691   | 0.0304 | 0.0234 |
| glucose | 03:49455330     | rs11715915 | <i>AMT</i>             | C      | T        | 0.012     | 0.002   | 0.0359   | 0.0260 | 0.1672 |
| glucose | 03:170717521    | rs11920090 | <i>SLC2A2</i>          | T      | A        | 0.026     | 0.003   | 0.0281   | 0.0375 | 0.4540 |
| glucose | 09:111680359    | rs16913693 | <i>IKBKAP</i>          | T      | G        | 0.043     | 0.007   | 0.0245   | 0.0599 | 0.6831 |
| glucose | 11:61571478     | rs174550   | <i>FADS1</i>           | T      | C        | 0.019     | 0.002   | 0.0181   | 0.0249 | 0.4668 |
| glucose | 06:7213200      | rs17762454 | <i>RREB1</i>           | T      | C        | 0.014     | 0.002   | -0.0089  | 0.0293 | 0.7608 |
| glucose | 07:15064309     | rs2191349  | <i>DGKB/TMEM195</i>    | T      | G        | 0.029     | 0.002   | 0.0123   | 0.0248 | 0.6182 |
| glucose |                 | rs2302593  | <i>GIPR</i>            | C      | G        | 0.014     | 0.002   | 0.0401   | 0.0244 | 0.1011 |
| glucose | 12:56865338     | rs2657879  | <i>GLS2</i>            | G      | A        | 0.016     | 0.003   | 0.0217   | 0.0342 | 0.5257 |
| glucose | 01:214159256    | rs340874   | <i>PROX1</i>           | C      | T        | 0.013     | 0.002   | 0.0353   | 0.0245 | 0.1493 |
| glucose | 14:100839261    | rs3783347  | <i>WARS</i>            | G      | T        | 0.017     | 0.003   | 0.0293   | 0.0279 | 0.2949 |
| glucose | 09:139256766    | rs3829109  | <i>LOC728489</i>       | G      | A        | 0.017     | 0.003   | 0.0558   | 0.0259 | 0.0313 |
| glucose | 10:114756041    | rs4506565  | <i>TCF7L2</i>          | T      | A        | 0.021     | 0.002   | 0.0331   | 0.0292 | 0.2576 |
| glucose | 07:44235668     | rs4607517  | <i>GCK</i>             | A      | G        | 0.057     | 0.003   | 0.1076   | 0.0380 | 0.0048 |
| glucose | 05:95539448     | rs4869272  | <i>PCSK1</i>           | T      | C        | 0.018     | 0.002   | 0.0178   | 0.0265 | 0.5023 |
| glucose | 02:169763148    | rs560887   | <i>G6PC2</i>           | C      | T        | 0.071     | 0.002   | 0.0828   | 0.0275 | 0.0027 |
| glucose | 13:33554302     | rs576674   | <i>KL</i>              | G      | A        | 0.017     | 0.003   | 0.0361   | 0.0332 | 0.2765 |

|         |              |           |                |   |   |       |       |         |        |        |
|---------|--------------|-----------|----------------|---|---|-------|-------|---------|--------|--------|
| glucose | 20:39743905  | rs6072275 | <i>TOP1</i>    | A | G | 0.016 | 0.003 | -0.0035 | 0.0326 | 0.9133 |
| glucose | 20:22557099  | rs6113722 | <i>FOXA2</i>   | G | A | 0.035 | 0.005 | -0.0840 | 0.0637 | 0.1881 |
| glucose | 07:50791579  | rs6943153 | <i>GRB10</i>   | T | C | 0.015 | 0.002 | 0.0118  | 0.0254 | 0.6432 |
| glucose | 03:185513392 | rs7651090 | <i>IGF2BP2</i> | G | A | 0.013 | 0.002 | 0.0053  | 0.0275 | 0.8460 |
| glucose | 05:76425867  | rs7708285 | <i>ZBED3</i>   | G | A | 0.015 | 0.003 | -0.0216 | 0.0270 | 0.4242 |
| glucose | 02:27741237  | rs780094  | <i>GCKR</i>    | C | T | 0.027 | 0.002 | 0.0074  | 0.0266 | 0.7820 |
| glucose | 09:4292152   | rs7867224 | <i>GLIS3</i>   | A | G | 0.013 | 0.002 | 0.0156  | 0.0248 | 0.5315 |
| glucose | 11:47336320  | rs7944584 | <i>MADD</i>    | A | T | 0.023 | 0.002 | -0.0022 | 0.0286 | 0.9378 |
| glucose | 06:20686996  | rs9368222 | <i>CDKAL1</i>  | A | C | 0.014 | 0.002 | 0.0294  | 0.0286 | 0.3042 |
| glucose | 08:9177732   | rs983309  | <i>PPP1R3B</i> | T | G | 0.026 | 0.003 | 0.1178  | 0.0408 | 0.0040 |

**ESM Table 3** Glucose SNP associations from MAGIC and ULSAM

| trait   | hg19_coordinate | snp        | Gene                   | effall | otherall | betatrait | setrait | estimate | stderr | p      |
|---------|-----------------|------------|------------------------|--------|----------|-----------|---------|----------|--------|--------|
| glucose | 09:22134094     | rs10811661 | <i>CDKN2B</i>          | T      | C        | 0.024     | 0.003   | 0.0425   | 0.0524 | 0.4179 |
| glucose | 11:92708710     | rs10830963 | <i>MTNR1B</i>          | G      | C        | 0.078     | 0.002   | 0.0973   | 0.0476 | 0.0417 |
| glucose | 10:113042093    | rs10885122 | <i>ADRA2A</i>          | G      | T        | 0.027     | 0.003   | 0.1119   | 0.0632 | 0.0773 |
| glucose | 15:62433962     | rs11071657 | <i>VPS13C/C2CD4A/B</i> | A      | G        | 0.010     | 0.002   | 0.0843   | 0.0407 | 0.0391 |
| glucose | 08:118185733    | rs11558471 | <i>SLC30A8</i>         | A      | G        | 0.029     | 0.002   | 0.1209   | 0.0446 | 0.0069 |
| glucose | 11:72432985     | rs11603334 | <i>ARAP1</i>           | G      | A        | 0.019     | 0.003   | 0.1159   | 0.0523 | 0.0274 |
| glucose | 11:45873091     | rs11605924 | <i>CRY2</i>            | A      | C        | 0.020     | 0.002   | 0.0636   | 0.0401 | 0.1139 |
| glucose | 13:28487599     | rs11619319 | <i>PDX1</i>            | G      | A        | 0.019     | 0.002   | -0.0744  | 0.0491 | 0.1303 |
| glucose | 03:123065778    | rs11708067 | <i>ADCY5</i>           | A      | G        | 0.023     | 0.003   | 0.0741   | 0.0480 | 0.1234 |
| glucose | 03:49455330     | rs11715915 | <i>AMT</i>             | C      | T        | 0.012     | 0.002   | -0.0097  | 0.0441 | 0.8259 |
| glucose | 03:170717521    | rs11920090 | <i>SLC2A2</i>          | T      | A        | 0.026     | 0.003   | -0.0971  | 0.0626 | 0.1213 |
| glucose | 09:111680359    | rs16913693 | <i>IKBKAP</i>          | T      | G        | 0.043     | 0.007   | 0.2047   | 0.0907 | 0.0246 |
| glucose | 11:61571478     | rs174550   | <i>FADS1</i>           | T      | C        | 0.019     | 0.002   | 0.0536   | 0.0437 | 0.2212 |
| glucose | 06:7213200      | rs17762454 | <i>RREB1</i>           | T      | C        | 0.014     | 0.002   | 0.0880   | 0.0465 | 0.0591 |
| glucose | 07:15064309     | rs2191349  | <i>DGKB/TMEM195</i>    | T      | G        | 0.029     | 0.002   | 0.0441   | 0.0423 | 0.2980 |
| glucose |                 | rs2302593  | <i>GIPR</i>            | C      | G        | 0.014     | 0.002   | 0.0588   | 0.0400 | 0.1422 |
| glucose | 12:56865338     | rs2657879  | <i>GLS2</i>            | G      | A        | 0.016     | 0.003   | 0.0634   | 0.0581 | 0.2757 |
| glucose | 01:214159256    | rs340874   | <i>PROX1</i>           | C      | T        | 0.013     | 0.002   | 0.0073   | 0.0392 | 0.8528 |
| glucose | 14:100839261    | rs3783347  | <i>WARS</i>            | G      | T        | 0.017     | 0.003   | 0.0172   | 0.0504 | 0.7336 |
| glucose | 09:139256766    | rs3829109  | <i>LOC728489</i>       | G      | A        | 0.017     | 0.003   | -0.0241  | 0.0442 | 0.5859 |
| glucose | 10:114756041    | rs4506565  | <i>TCF7L2</i>          | T      | A        | 0.021     | 0.002   | -0.0074  | 0.0455 | 0.8704 |
| glucose | 07:44235668     | rs4607517  | <i>GCK</i>             | A      | G        | 0.057     | 0.003   | 0.0368   | 0.0577 | 0.5237 |
| glucose | 05:95539448     | rs4869272  | <i>PCSK1</i>           | T      | C        | 0.018     | 0.002   | -0.0147  | 0.0445 | 0.7407 |
| glucose | 02:169763148    | rs560887   | <i>G6PC2</i>           | C      | T        | 0.071     | 0.002   | 0.1095   | 0.0426 | 0.0105 |
| glucose | 13:33554302     | rs576674   | <i>KL</i>              | G      | A        | 0.017     | 0.003   | 0.0227   | 0.0627 | 0.7169 |

|         |              |           |                |   |   |       |       |         |        |        |
|---------|--------------|-----------|----------------|---|---|-------|-------|---------|--------|--------|
| glucose | 20:39743905  | rs6072275 | <i>TOP1</i>    | A | G | 0.016 | 0.003 | -0.0284 | 0.0534 | 0.5946 |
| glucose | 20:22557099  | rs6113722 | <i>FOXA2</i>   | G | A | 0.035 | 0.005 | -0.1139 | 0.1062 | 0.2842 |
| glucose | 07:50791579  | rs6943153 | <i>GRB10</i>   | T | C | 0.015 | 0.002 | 0.0337  | 0.0425 | 0.4283 |
| glucose | 03:185513392 | rs7651090 | <i>IGF2BP2</i> | G | A | 0.013 | 0.002 | 0.0609  | 0.0437 | 0.1645 |
| glucose | 05:76425867  | rs7708285 | <i>ZBED3</i>   | G | A | 0.015 | 0.003 | 0.0683  | 0.0469 | 0.1463 |
| glucose | 02:27741237  | rs780094  | <i>GCKR</i>    | C | T | 0.027 | 0.002 | -0.0082 | 0.0438 | 0.8517 |
| glucose | 09:4292152   | rs7867224 | <i>GLIS3</i>   | A | G | 0.013 | 0.002 | 0.0424  | 0.0410 | 0.3018 |
| glucose | 11:47336320  | rs7944584 | <i>MADD</i>    | A | T | 0.023 | 0.002 | 0.0630  | 0.0485 | 0.1943 |
| glucose | 06:20686996  | rs9368222 | <i>CDKAL1</i>  | A | C | 0.014 | 0.002 | 0.0743  | 0.0428 | 0.0832 |
| glucose | 08:9177732   | rs983309  | <i>PPP1R3B</i> | T | G | 0.026 | 0.003 | 0.1645  | 0.0667 | 0.0142 |

**ESM Table 4** Tests for heterogeneity from the Inverse variance weighted analysis.

| <b>Outcome</b>         | <b>Cohort</b> | <b>H</b> | <b>I<sup>2</sup></b> |
|------------------------|---------------|----------|----------------------|
| Bone area of total hip | SMCC          | 1.1      | 11                   |
| Bone area of total hip | PIVUS         | 1.0      | 1                    |
| Bone area of total hip | ULSAM         | 1.0      | 0                    |
| BMD of total hip       | SMCC          | 1.0      | 6                    |
| BMD of total hip       | PIVUS         | 1.0      | 7                    |
| BMD of total hip       | ULSAM         | 1.3      | 40                   |

**ESM Table 5.** F-statistics for Swedish Mammography Cohort clinical (SMCC), Prospective Investigation in the Vasculature of Uppsala Seniors (PIVUS) and Uppsala Longitudinal Study of Adult Men (ULSAM) from our one sample MR analysis using the weighted genetic risk score (wGRS)

|      | SMCC      | PIVUS     | ULSAM     |
|------|-----------|-----------|-----------|
| wGRS | 195.50493 | 40.103464 | 50.275994 |

Adjusted for age and genetic principle components.



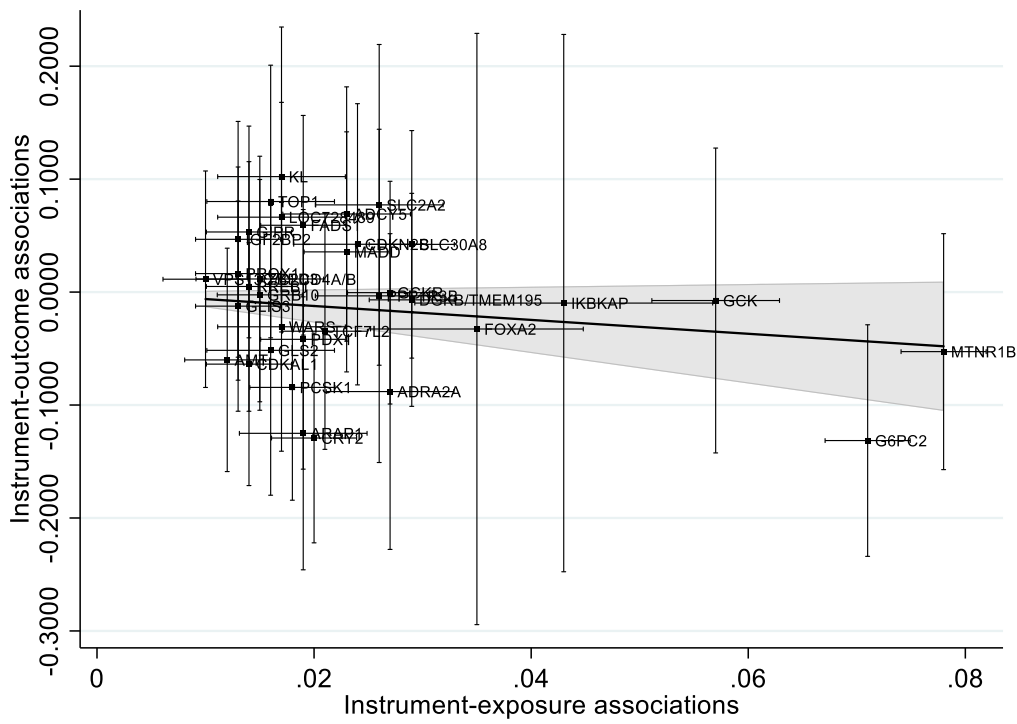

**ESM Fig. 1** The association of 35 glucose associated SNPs with bone area measured in SMCC

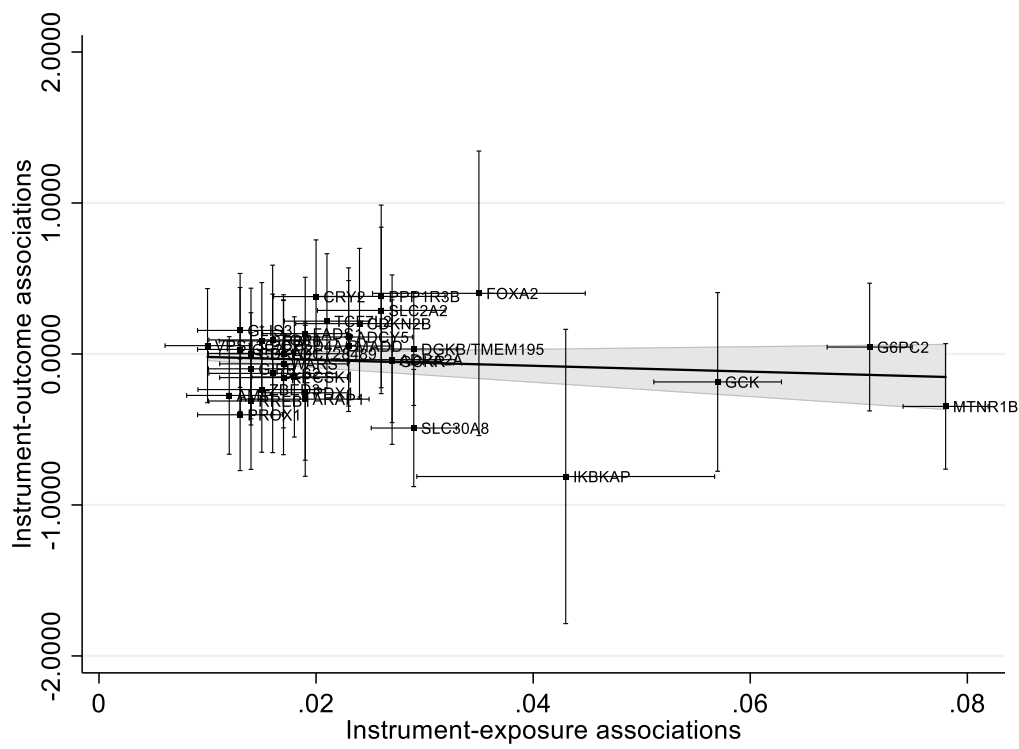

**ESM Fig. 2** The association of 35 glucose associated SNPs with bone area measured in PIVUS

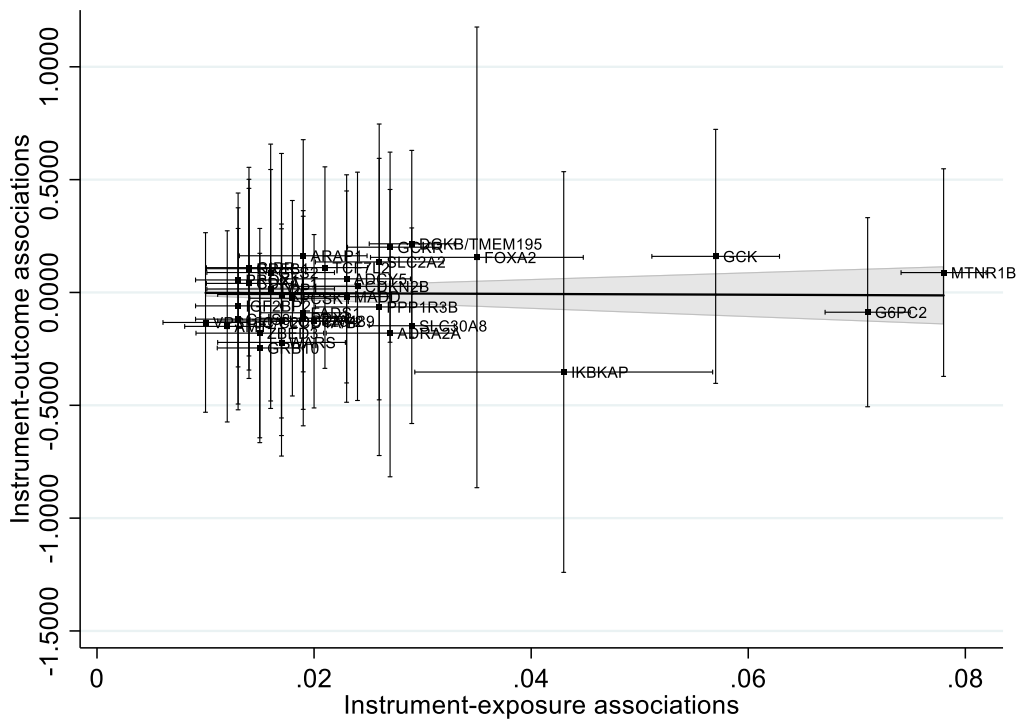

ESM Fig. 3 The association of 35 glucose associated SNPs with bone area measured in ULSAM



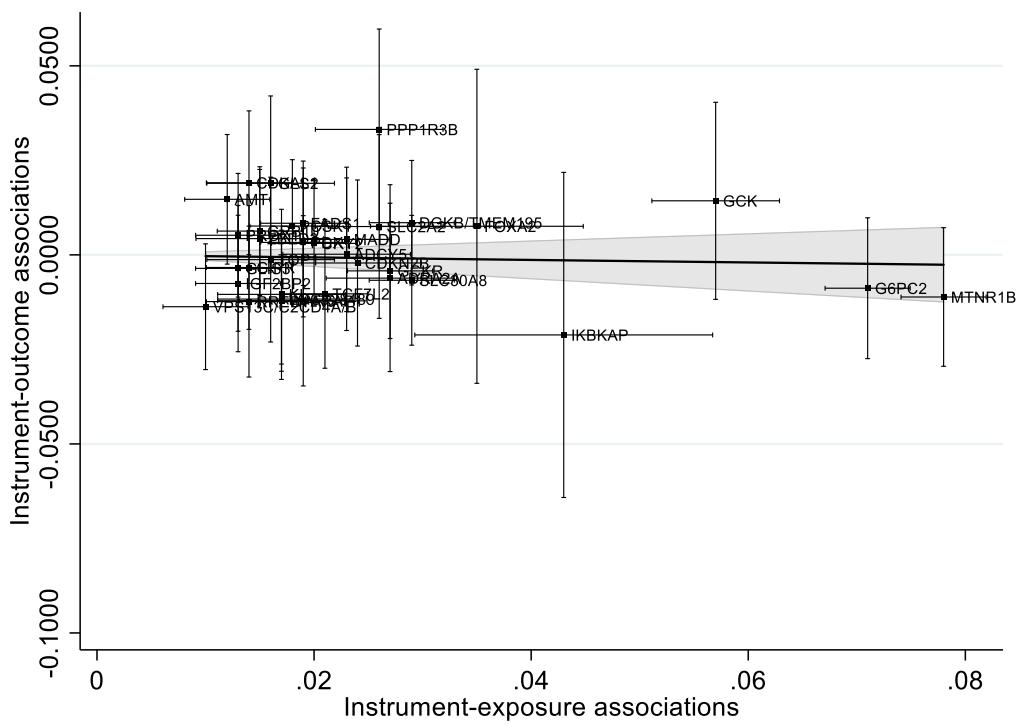

**ESM Fig. 5** The association of 35 glucose associated SNPs with bone mineral density (BMD) measured in PIVUS

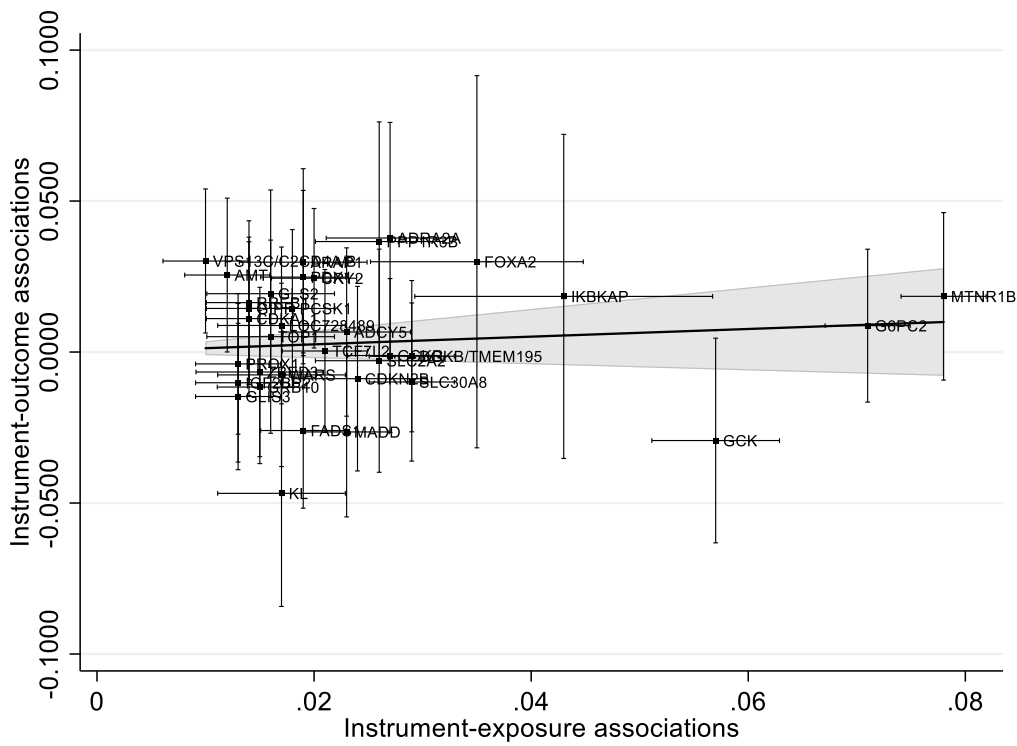

**ESM Fig. 6** The association of 35 glucose associated SNPs with bone mineral density (BMD) measured in ULSAM

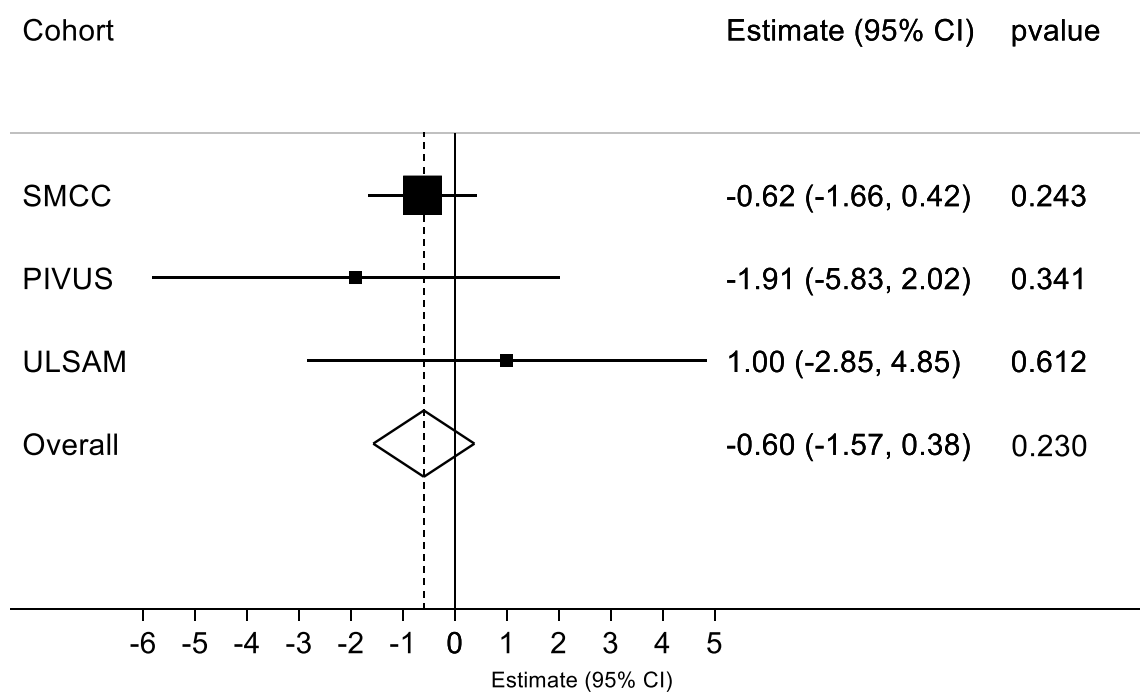

**ESM Fig. 7** Meta-analysis of glucose variants to bone area using the weighted median approach in SMCC, PIVUS & ULSAM

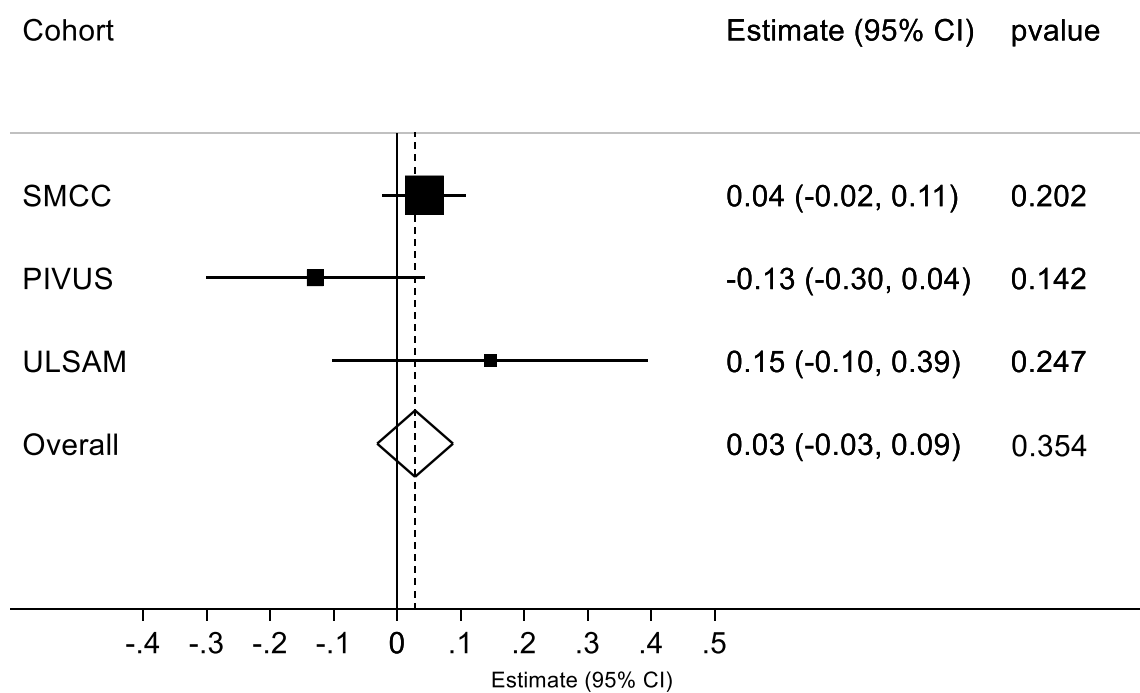

**ESM Fig. 8** Meta-analysis of glucose variants to bone mineral density (BMD) using the weighted median approach in SMCC, PIVUS & ULSAM



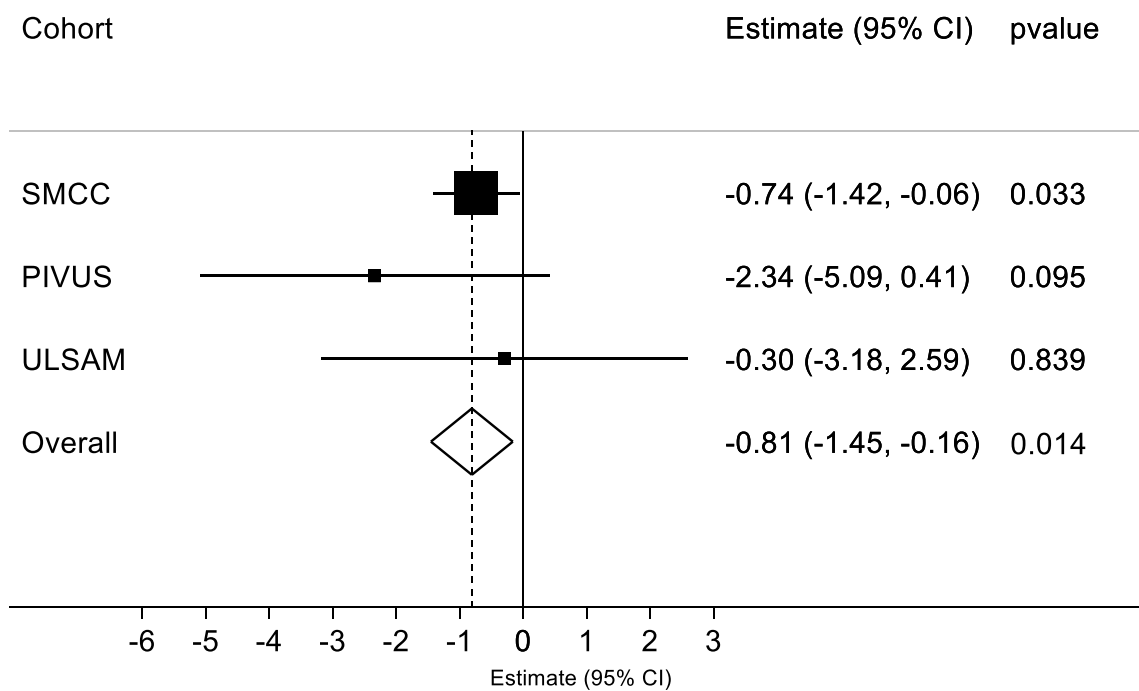

**ESM Fig. 9** Meta-analysis of glucose variants to bone area adjusted for the genetic effect of height in SMCC, PIVUS & ULSAM

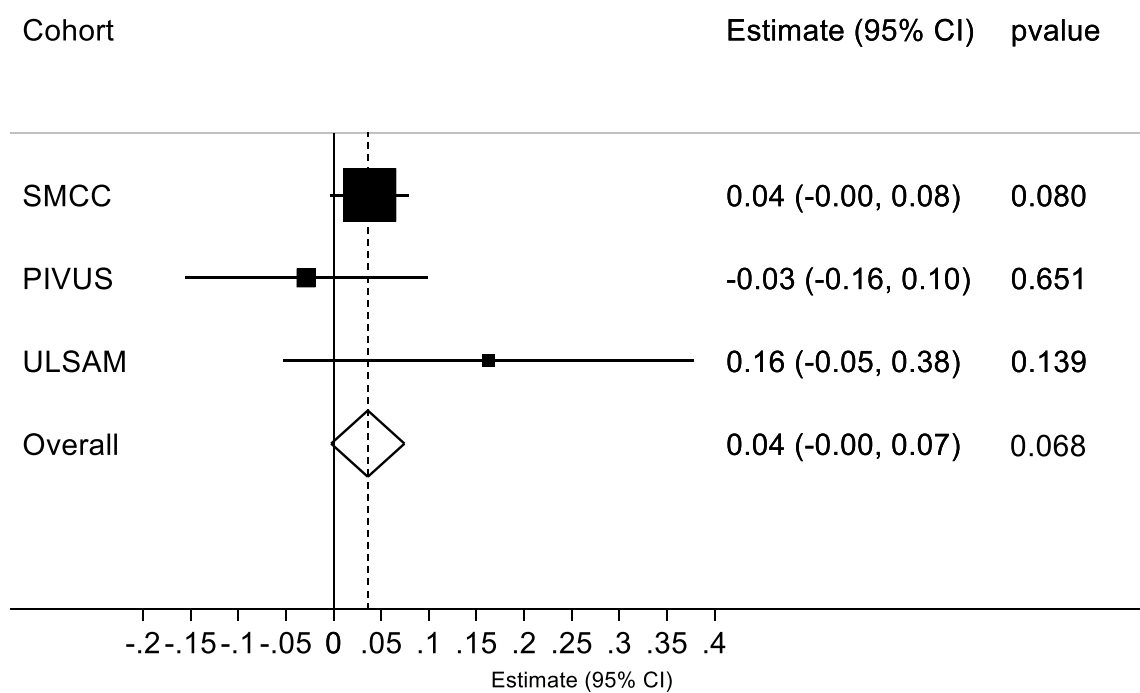

**ESM Fig. 10** Meta-analysis of glucose variants to bone mineral density adjusted for the genetic effect of height in SMCC, PIVUS & ULSAM

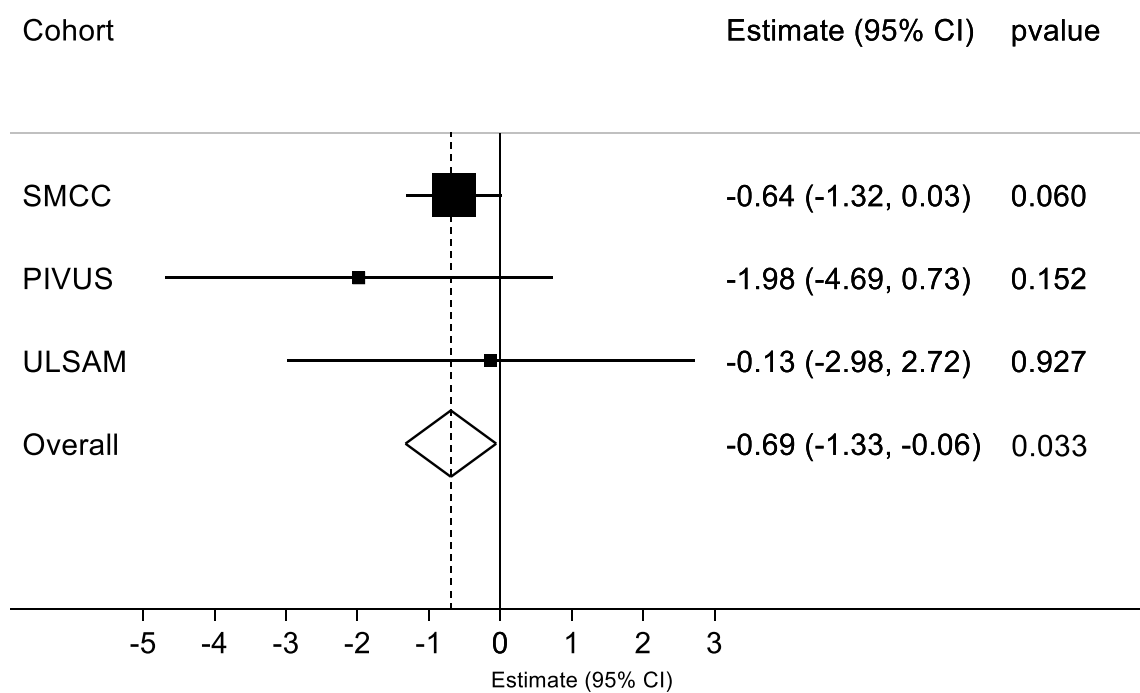

**ESM Fig. 11** Meta-analysis of glucose variants to bone area after removing SNP (rs7651090, for gene IGF2BP2) in SMCC, PIVUS & ULSAM

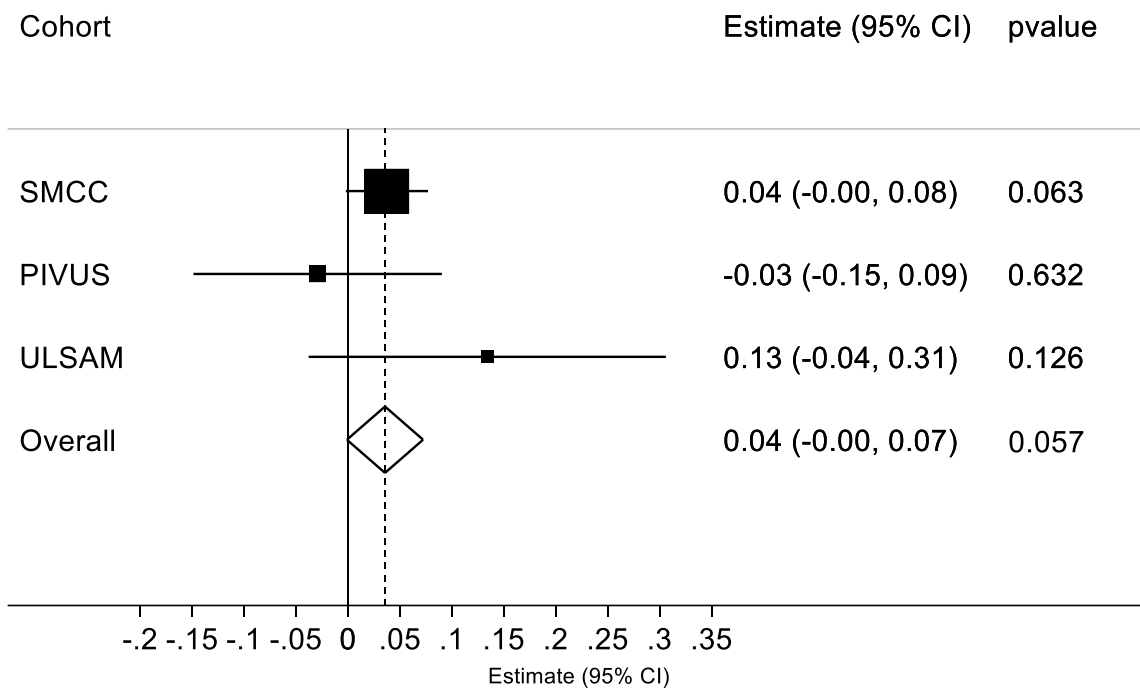

**ESM Fig. 12** Meta-analysis of glucose variants to bone mineral density after removing SNP (rs7651090, for gene IGF2BP2) in SMCC, PIVUS & ULSAM

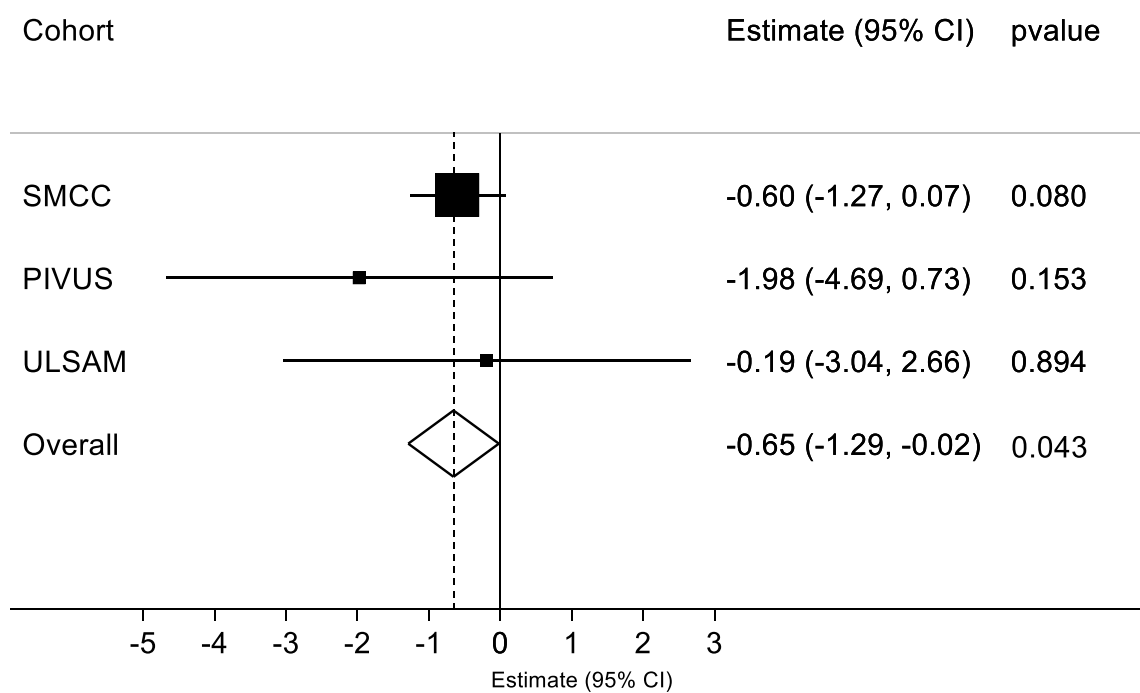

**ESM Fig. 13** Meta-analysis of glucose variants to bone area adjusted for the genetic effect of BMI in SMCC, PIVUS & ULSAM

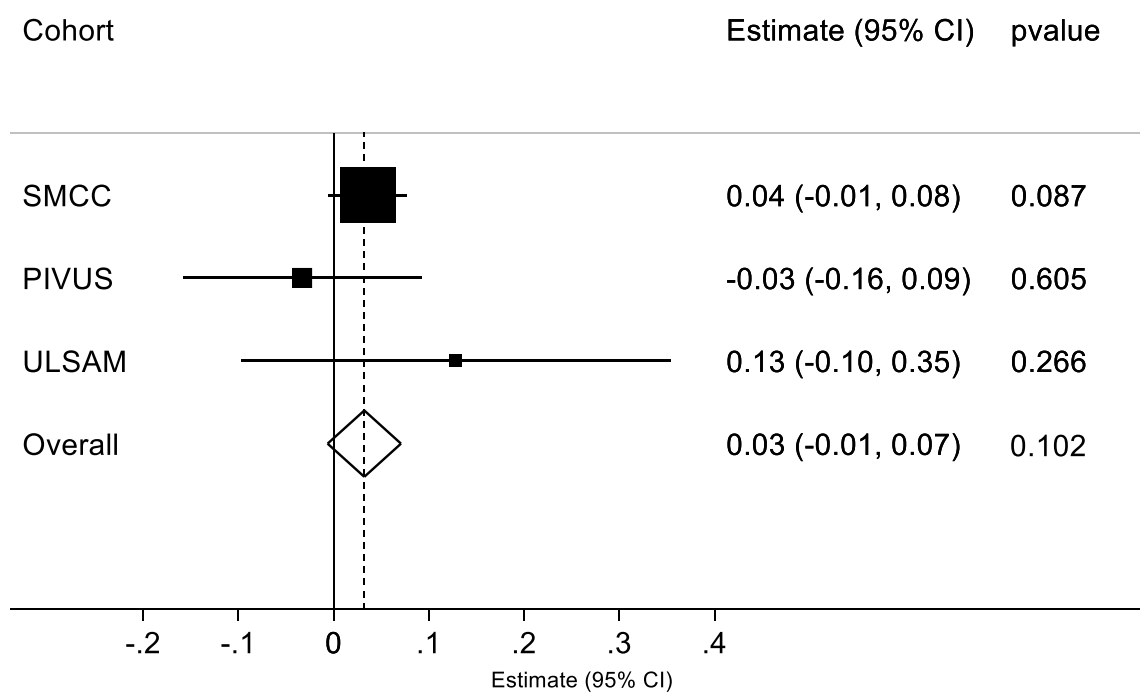

**ESM Fig. 14** Meta-analysis of glucose variants to bone mineral density adjusted for the genetic effect of BMI in SMCC, PIVUS & ULSAM

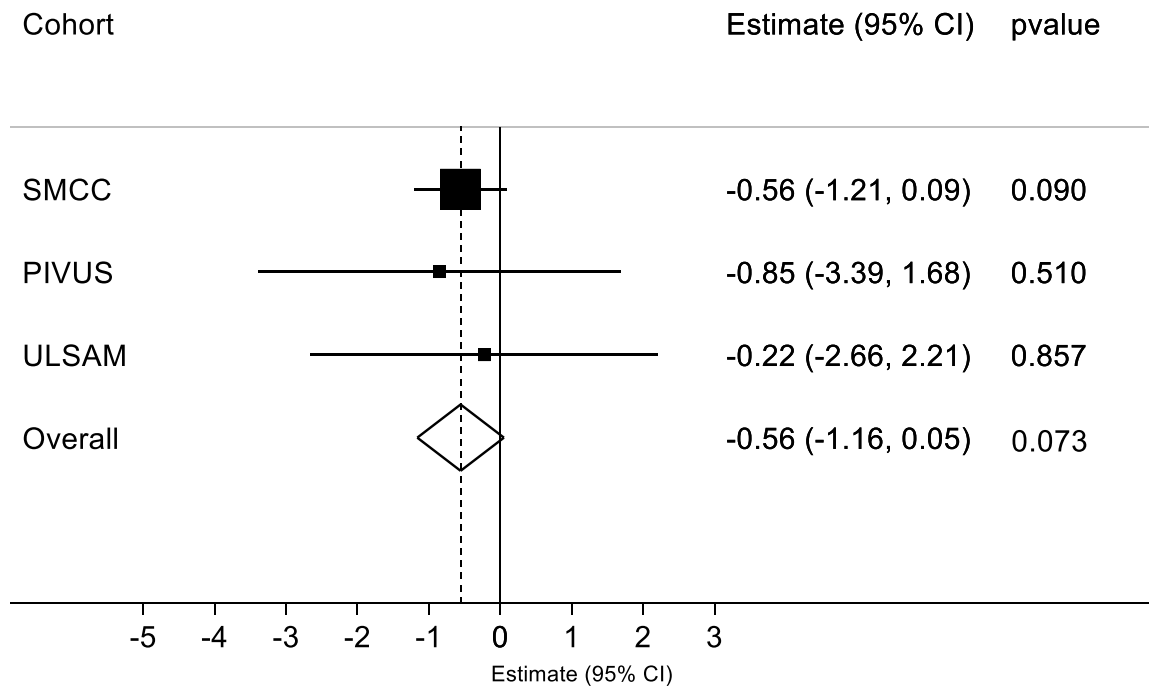

**ESM Fig. 15** Meta-analysis of glucose variants to bone area in SMCC, PIVUS & ULSAM including those with T2DM

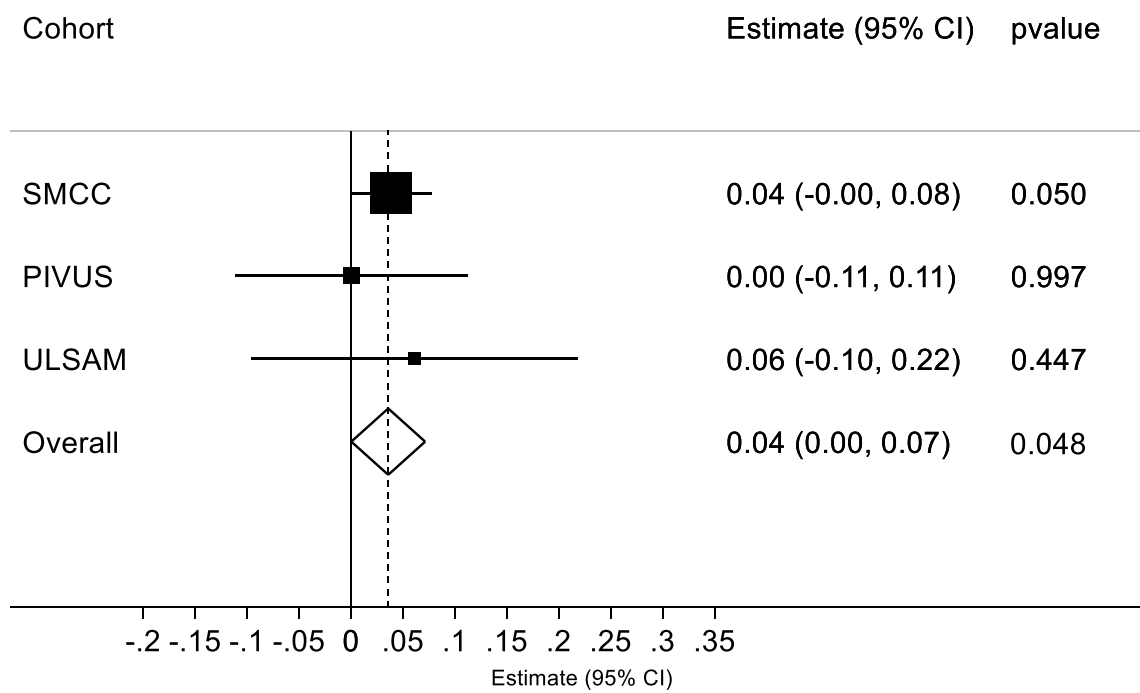

**ESM Fig. 16** Meta-analysis of glucose variants to BMD in SMCC, PIVUS & ULSAM including those with T2DM



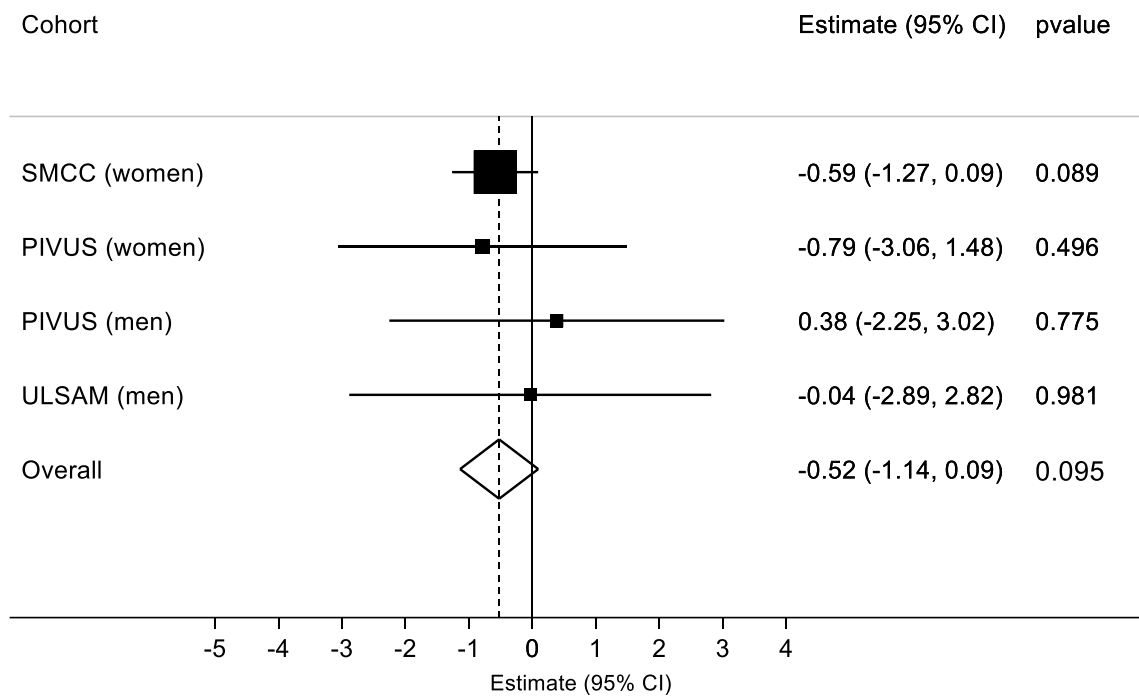

**ESM Fig. 17** Meta-analysis of glucose variants to bone area in SMCC, PIVUS & ULSAM using sex specific beta estimates for fasting glucose (<https://www.magicinvestigators.org/downloads/>)

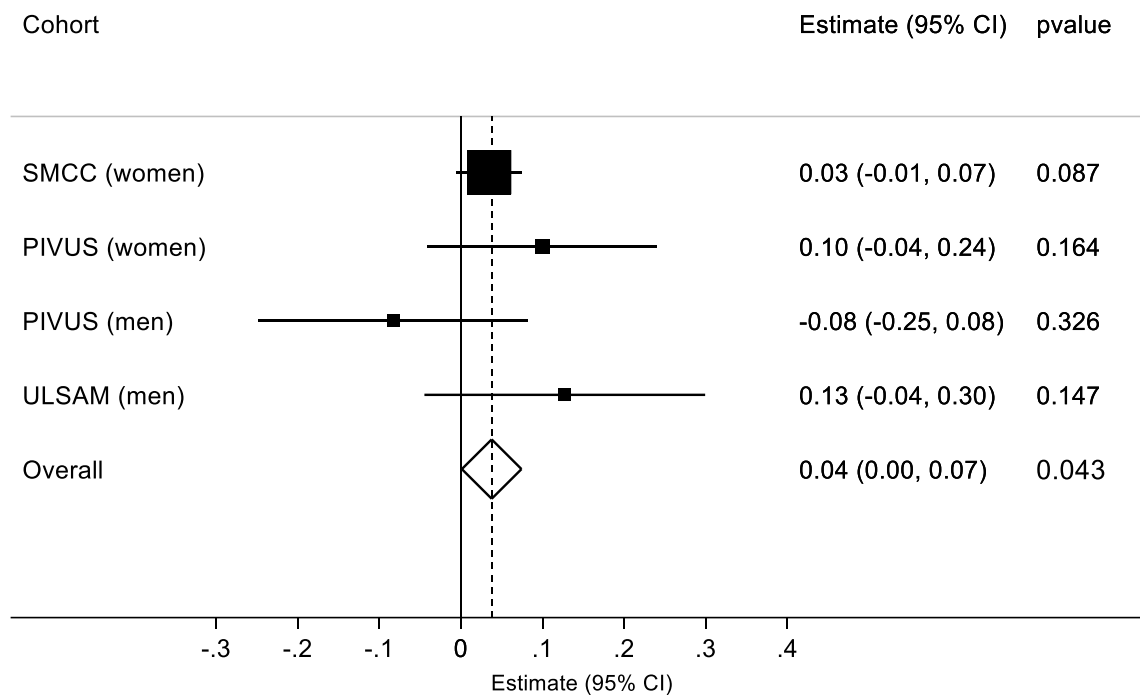

**ESM Fig. 18** Meta-analysis of glucose variants to BMD in SMCC, PIVUS & ULSAM using sex specific beta estimates for fasting glucose (<https://www.magicinvestigators.org/downloads/>)

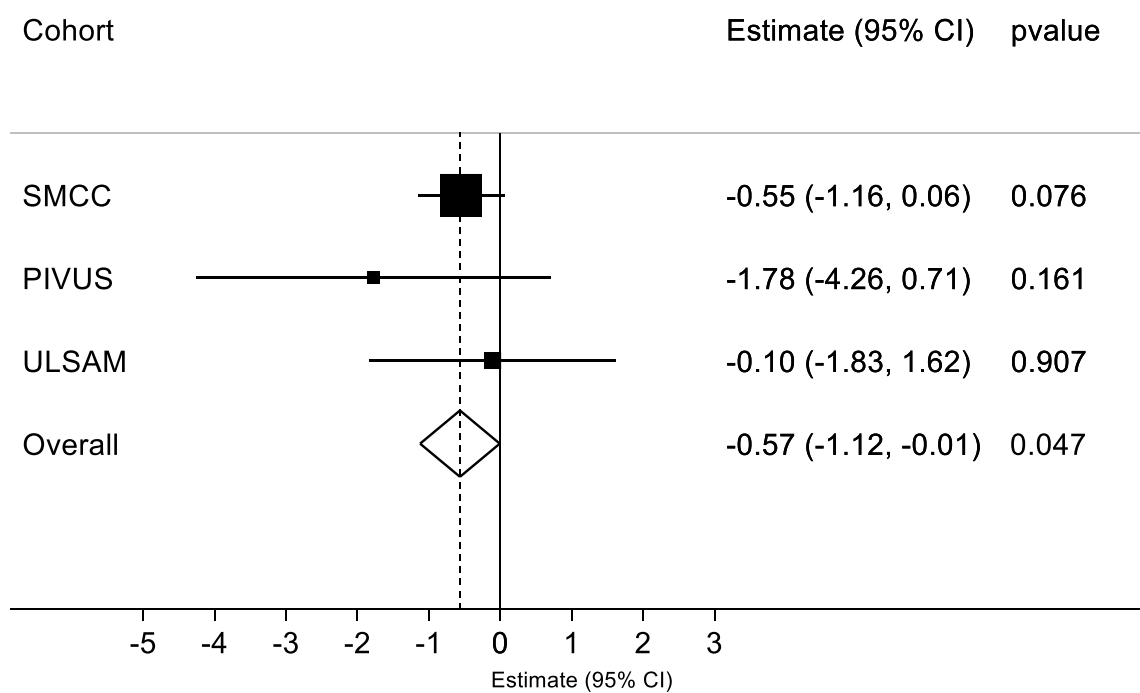

**ESM Fig. 19** Meta-analysis of weighted genetic risk score (wGRS) to bone area in SMCC, PIVUS & ULSAM

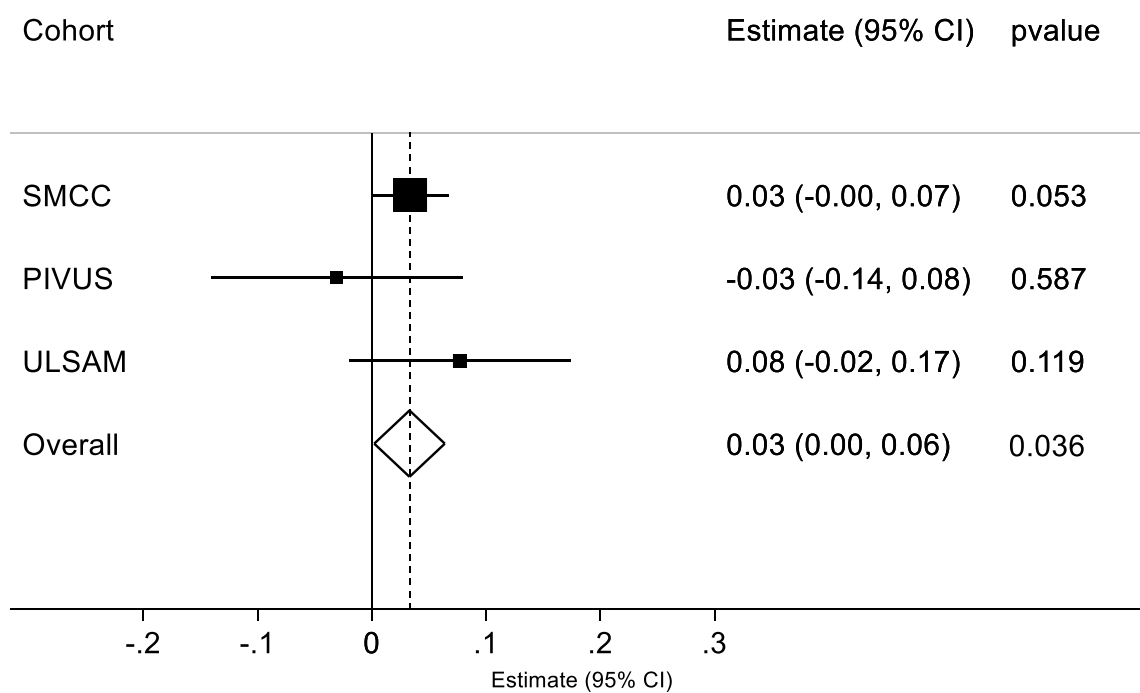

**ESM Fig. 20** Meta-analysis of weighted genetic risk score (wGRS) to bone mineral density (BMD) in SMCC, PIVUS & ULSAM

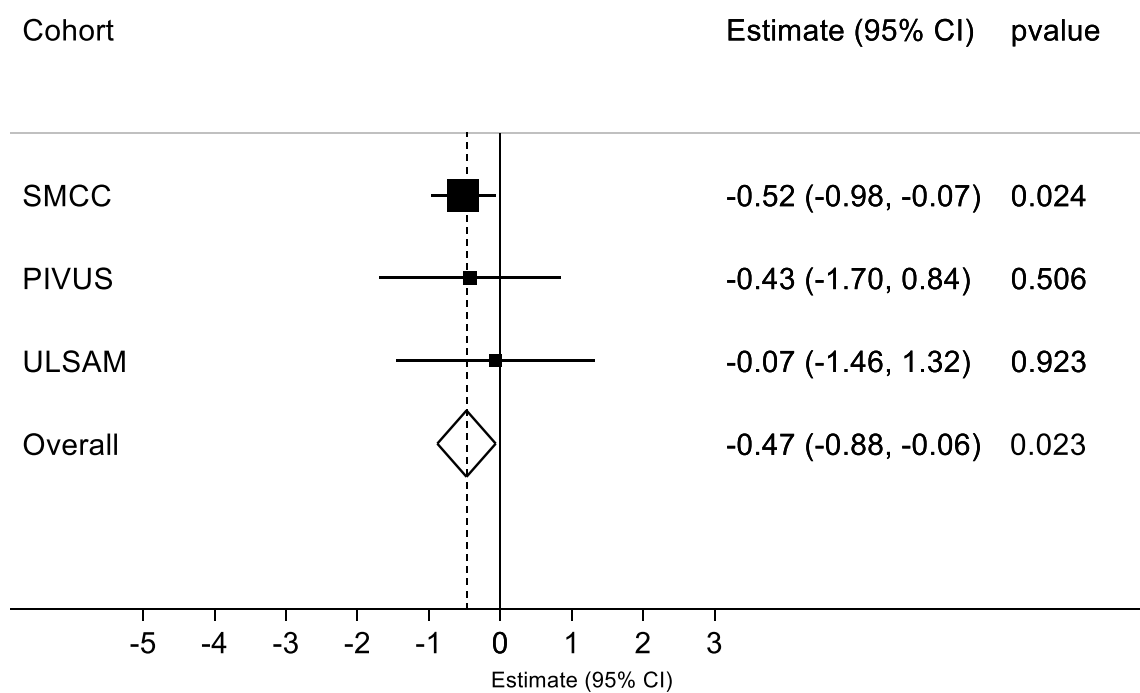

**ESM Fig. 21** Meta-analysis of weighted genetic risk score (wGRS) to bone area adjusted for height and BMI in SMCC, PIVUS & ULSAM

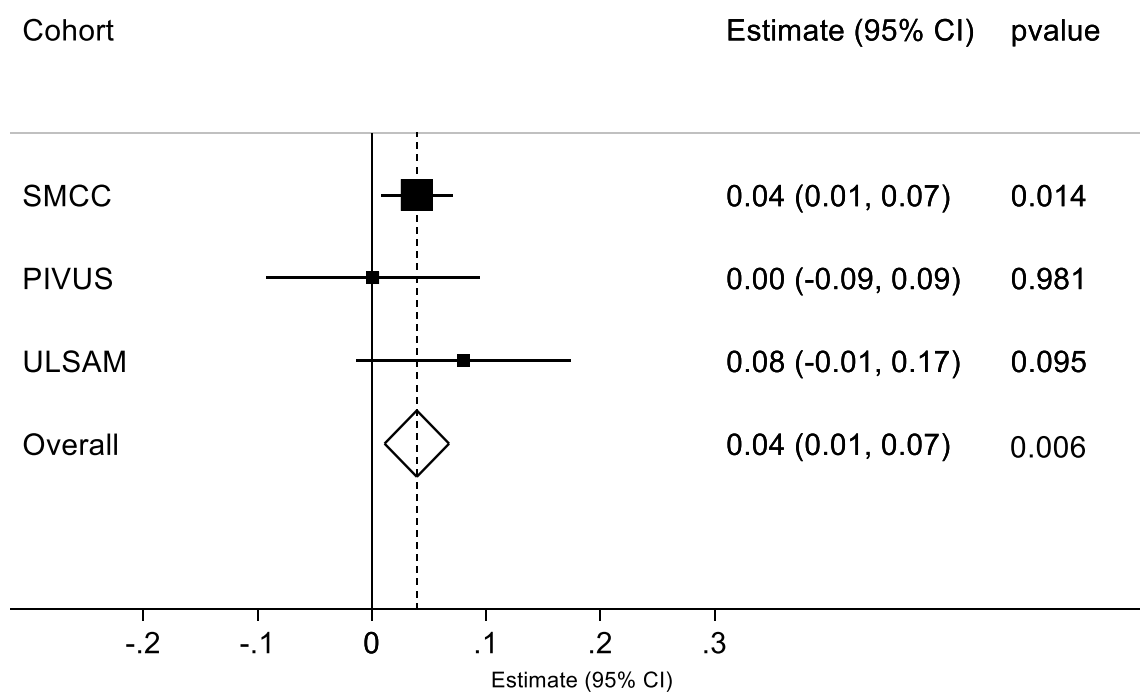

**ESM Fig. 22** Meta-analysis of weighted genetic risk score (wGRS) to bone mineral density (BMD) adjusted for height and BMI in SMCC, PIVUS & ULSAM
